# Supplementary material for: Metabolome and Transcriptome Profiling Reveals the Function of MdSYP121 in the Apple Response to Botryosphaeria dothidea
Source: MDPI journal article supplement (doi:10.3390/ijms242216242), 2023-11-13
Supplement: s1 [file s1]

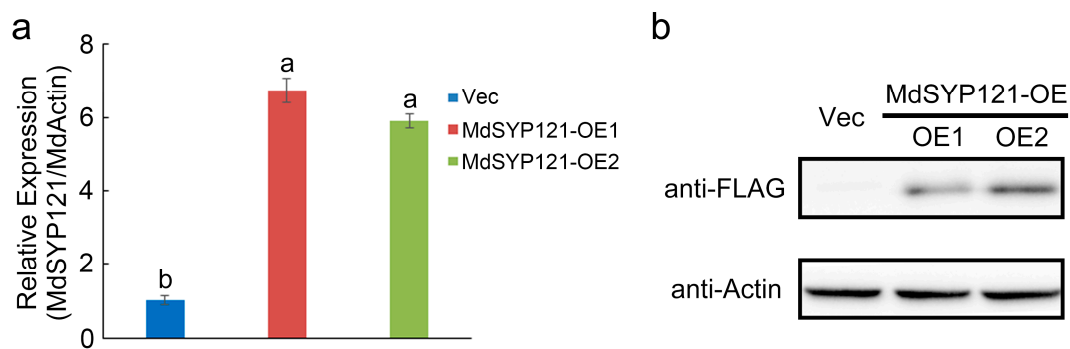

**Figure S1.** Representative phenotypes of transgenic apple plants and identification of *MdSYP121*-OE transgenic apple calli. (a) *MdSYP121*-OE transgenic apple calli were confirmed by RT-qPCR and Western blot RT-qPCR and Western blot. (b) Representative phenotypes of Vec and *MdSYP121*-OE calli lines with *B. dothidea* infection for 4 days.

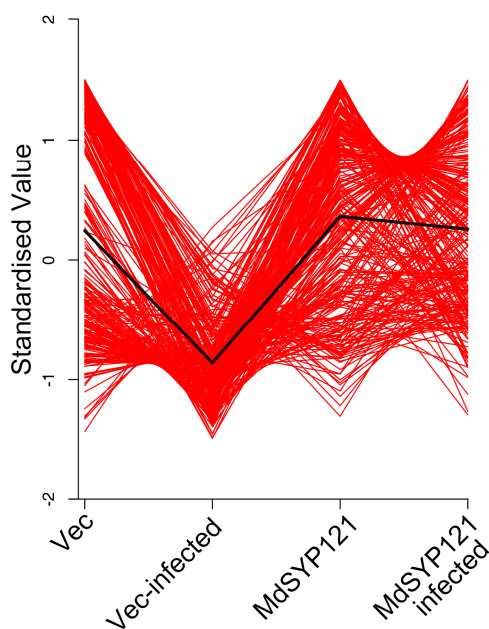

**Figure S2.** K-Means clustering analysis in *MdSYP121*-OE and Vec calli infected with *B. dothidea*.
